# Supplementary material for: Linkage Abundance and Molecular Weight Characteristics of Technical Lignins by Attenuated Total Reflection‐FTIR Spectroscopy Combined with Multivariate Analysis
Source: PubMed Central journal article supplement — ChemSusChem. 2019 Feb 1;12(6):1139–46. doi: 10.1002/cssc.201802809 (PMC6563701; doi:10.1002/cssc.201802809), 2019-02-01
Supplement: CSSC-12-1139-s001.pdf [file CSSC-12-1139-s001.pdf]

## Supporting Information

### **Linkage Abundance and Molecular Weight Characteristics of Technical Lignins by Attenuated Total Reflection-FTIR Spectroscopy Combined with Multivariate Analysis**

Christopher S. Lancefield,<sup>[a]</sup> Sandra Constant,<sup>[a]</sup> Peter de Peinder,<sup>[b]</sup> and Pieter C. A. Bruijninx<sup>\*[a, c]</sup>

cssc\_201802809\_sm\_miscellaneous\_information.pdf

## Table of Contents

|                                              |            |
|----------------------------------------------|------------|
| <b>General methods and information .....</b> | <b>S2</b>  |
| <b>Table S1 .....</b>                        | <b>S4</b>  |
| <b>Table S2 .....</b>                        | <b>S6</b>  |
| <b>Table S3 .....</b>                        | <b>S7</b>  |
| <b>Table S4 .....</b>                        | <b>S8</b>  |
| <b>Table S5 .....</b>                        | <b>S9</b>  |
| <b>Table S6 .....</b>                        | <b>S9</b>  |
| <b>Table S7 .....</b>                        | <b>S10</b> |
| <b>Figure S1 .....</b>                       | <b>S11</b> |
| <b>Figure S2 .....</b>                       | <b>S12</b> |
| <b>Figure S3 .....</b>                       | <b>S13</b> |
| <b>References .....</b>                      | <b>S14</b> |

## General Methods and Information

### Commercial Lignins

Indulin AT kraft lignin (softwood, Meadwestvaco, US) and soda lignin Protobind™ 1000 (mixed wheat straw/Sarkanda grass, GreenValue S.A., Switzerland) were obtained from commercial sources. BioChoice and RAIZ Eucalyptus kraft lignins were kind donations from UPM Biochemicals (Finland) and the Forest and Paper Research Institute (RAIZ, Portugal), respectively. Alcell™ organosolv lignin (mixed hardwoods; maple, birch and poplar) was obtained from Repap Technology, Canada. One organosolv lignin was obtained from Sigma-Aldrich (product now discontinued) via Royal Dutch Shell (The Netherlands).

### Lignin Preparation Methods

#### A: Purification of Lignin

Kraft lignin was dissolved in acetone/water (8:2, 20 mL/g) and then added dropwise to rapidly stirring water containing 0.02 M HCl (40 mL/g). The precipitated lignin was collected by filtration, washed thoroughly with water and allowed to air dry to a constant weight. The dried filter cake was manually ground in a pestle and mortar to give a fine powder, which was then rapidly stirred with Et<sub>2</sub>O (20 mL/g) for 1 h to remove extractives. The lignin was finally filtered and allowed to air dry to a constant weight.

#### B: Solvent Fractionation of Lignin (1)

Kraft lignin was extracted sequentially with mixtures of EtOAc/Et<sub>2</sub>O and/or EtOAc/MeOH and/or Acetone/MeOH (20 mL/g) of increasing polarity, as specified in Table S1, by stirring for 1 h. The soluble fractions were collected by centrifugation or filtration and concentrated *in vacuo*. The insoluble material from each step was returned for the next extraction. The resulting powders were then wetted with water to form a paste and allowed to air dry at 50 °C overnight. This was repeated 3 times to eliminate traces of residual organic solvent from the lignin.

#### C: Lignin Fractionation (2)

Fractionation of technical lignins were performed according to previously reported methods.<sup>1</sup>

#### D: Ethanol Based Organosolv Lignin Extraction

This acid-catalysed, ethanol-based organosolv process was developed by the Energy Research Centre of the Netherlands (ECN, now ECN part of TNO). The organosolv procedures and lignin isolation methods have been reported in detail elsewhere.<sup>2-4</sup> In short, the following parameters were used: 190 °C, 60 min, H<sub>2</sub>SO<sub>4</sub> acidified, 60 wt% aqueous ethanol in a 20 L batch autoclave reactor (Büchi Glas Uster AG, Switzerland). The specific biomass related process conditions were: Wheat Straw - <10 mm, 11 L/kg DM, 20 mM H<sub>2</sub>SO<sub>4</sub>; Spruce - <6 mm, 5 L/kg DM, 10 mM H<sub>2</sub>SO<sub>4</sub>.

#### E: Dioxasolv Lignin

The dioxasolv procedure and lignin isolation methods have been reported in detail elsewhere.<sup>5,6</sup> Softwood and Brewer's Spent Grain lignins (Entry 46 and 48, Table S1 respectively) were extracted using the following parameters: 1 h reflux, 1,4-dioxane/water (9:1), 0.2 M HCl, 10 L/kg DM; Softwood

lignin (Entry 47, Table S1) was extracted using the following parameters: 1 h reflux, 1,4-dioxane/water (8:2), 0.1 M HCl, 10 L/kg DM.

#### **F: 140 °C Ethanosolv Lignin**

This organosolv procedure was the same as that reported for method D but with the following parameters: 140 °C, 120 min, 60% w/w aqueous ethanol, 60 mM sulfuric acid and 10 L/kg DM.

#### **G: 140 °C Acetone Lignin**

This organosolv procedure and lignin isolation methods have been reported in detail elsewhere.<sup>7</sup> The extraction used the following parameters: 140 °C, 60 min, 50% w/w aqueous acetone, 60 mM sulfuric acid, 10 L/kg DM.

### **NMR Methods**

High-field NMR spectra were acquired on a Bruker Avance II 600 MHz spectrometer equipped with a 5 mm CPTCI <sup>1</sup>H-<sup>13</sup>C/<sup>15</sup>N-<sup>2</sup>H cryogenic probe with z-gradients at 25 °C. <sup>1</sup>H-<sup>13</sup>C Heteronuclear single quantum coherence spectroscopy (HSQC) spectra were recorded using either:

**A:** Bruker pulse program 'hsqcetgppsp.3' using the following parameters: acquired from 13 to -1 ppm in F2 (<sup>1</sup>H) with 2048 data points, 160 to 0 ppm in F1 (<sup>13</sup>C) with 256 increments with a 1 s interscan delay (D1); cnst2 was set to 145 Hz.

**B:** Q-CAHSQC pulse program<sup>8</sup> using the following parameters: acquired from 13 to -1 ppm in F2 (<sup>1</sup>H) with 2048 data points, 160 to 0 ppm in F1 (<sup>13</sup>C) with 128 increments with a 6 s interscan delay (D1); cnst2 was set to 145 Hz.

In both cases the data was processed used Gaussian apodization (GB = 0.1, LB = 0.3 Hz) in F2 and squared cosine-bell and one level of linear prediction (32 coefficients) in F1.

**NOTE:** The detailed structural characterization of some of the included lignins have been reported by us previously. Where this is the case the references are given in Table S1. For this study the original HSQC NMR spectra were reprocessed for internal consistency and all GPC measurements were re-run to ensure an internally consistent data set.

**Table S1** GPC, 2D HSQC analysis and isolation methods of the calibration lignins. Entries marked with \* were also used for the second, kraft-only analysis. Values >1 reported to 2 significant figures, <1 reported to 1 significant figure.

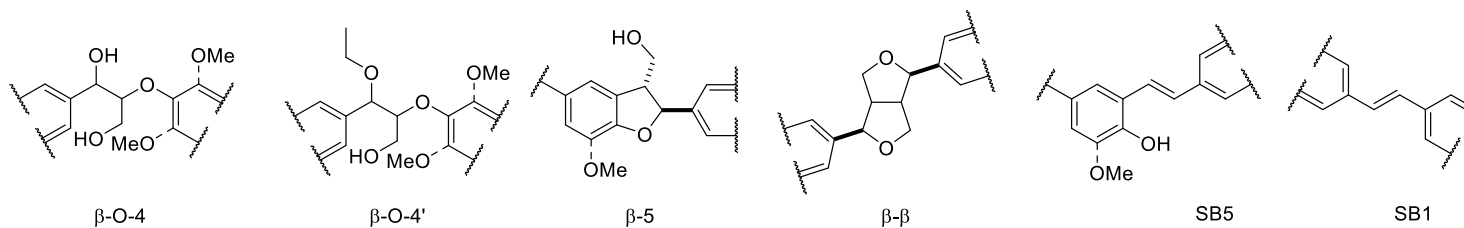

| Entry | Lignin                                         | M <sub>n</sub> | M <sub>w</sub> | Log(M <sub>n</sub> ) | Log(M <sub>w</sub> ) | $\beta$ -O-4 | $\beta$ -O-4'<br>( $\alpha$ -OEt) | $\beta$ -O-4+<br>$\beta$ -O-4' | $\beta$ -5 | $\beta$ - $\beta$ | SB5  | SB1 | Prep. Method | NMR Method | Ref. |
|-------|------------------------------------------------|----------------|----------------|----------------------|----------------------|--------------|-----------------------------------|--------------------------------|------------|-------------------|------|-----|--------------|------------|------|
| 1*    | Purified Indulin AT EtOAc (BNU) <sup>[a]</sup> | 752            | 1093           | 2.9                  | 3.0                  | 1.1          | 0.0                               | 1.1                            | 0.5        | 1.1               | 9.3  | 3.5 | A+B          | A          |      |
| 2*    | Purified Indulin AT 5% EtOAc/MeOH (BNU)        | 1086           | 1691           | 3.0                  | 3.2                  | 3.1          | 0.0                               | 3.1                            | 1.3        | 1.6               | 10   | 2.3 | A+B          | A          |      |
| 3*    | Purified Indulin AT 10% EtOAc/MeOH (BNU)       | 1570           | 2579           | 3.2                  | 3.4                  | 5.2          | 0.0                               | 5.2                            | 2.5        | 2.0               | 9.3  | 1.3 | A+B          | A          |      |
| 4*    | Purified Indulin AT 20% EtOAc/MeOH (BNU)       | 2069           | 4098           | 3.3                  | 3.6                  | 8.3          | 0.0                               | 8.3                            | 2.9        | 2.3               | 5.4  | 0.9 | A+B          | A          |      |
| 5*    | Purified Indulin AT 30% EtOAc/MeOH (BNU)       | 2423           | 5999           | 3.4                  | 3.8                  | 10.1         | 0.0                               | 10                             | 3.8        | 2.5               | 5.9  | 0.6 | A+B          | A          |      |
| 6*    | Purified Indulin AT 40% EtOAc/MeOH (BNU)       | 3367           | 10577          | 3.5                  | 4.0                  | 11.3         | 0.0                               | 11                             | 4.0        | 2.8               | 4.5  | 0.2 | A+B          | A          |      |
| 7*    | Purified Indulin AT 100 %MeOH (BNU)            | 2508           | 9124           | 3.4                  | 4.0                  | 10.9         | 0.0                               | 11                             | 3.9        | 2.1               | 4.4  | 0.3 | A+B          | A          |      |
| 8*    | Purified Indulin AT 1:1 Acetone/MeOH (BNU)     | 3192           | 16625          | 3.5                  | 4.2                  | 12.7         | 0.0                               | 13                             | 4.0        | 2.9               | 3.8  | 0.3 | A+B          | A          |      |
| 9     | Crude Indulin AT (BNU)                         | 1085           | 4669           | 3.0                  | 3.7                  | 8.2          | 0.0                               | 10                             | 2.0        | 1.6               | 9.0  | 2.2 | Commercial   | A          |      |
| 10    | Purified Indulin AT (BNU)                      | 1238           | 5703           | 3.1                  | 3.8                  | 6.5          | 0.0                               | 8.6                            | 2.1        | 1.5               | 7.1  | 1.9 | A            | A          |      |
| 11*   | Purified Indulin AT SA31 EtOAc                 | 829            | 1222           | 2.9                  | 3.1                  | 1.1          | 0.0                               | 1.1                            | 0.6        | 1.4               | 10.1 | 3.4 | A+B          | A          |      |
| 12*   | Purified Indulin AT SA31 5% EtOAc/MeOH         | 1169           | 2016           | 3.1                  | 3.3                  | 3.4          | 0.0                               | 3.4                            | 1.4        | 1.7               | 8.2  | 1.2 | A+B          | A          |      |
| 13*   | Purified Indulin AT SA31 10% EtOAc/MeOH        | 1743           | 2972           | 3.2                  | 3.5                  | 6.1          | 0.0                               | 6.1                            | 2.2        | 2.0               | 7.1  | 0.7 | A+B          | A          |      |
| 14*   | Purified Indulin AT SA31 20% EtOAc/MeOH        | 2345           | 4951           | 3.4                  | 3.7                  | 8.8          | 0.0                               | 8.8                            | 3.0        | 2.2               | 6.5  | 0.5 | A+B          | A          |      |
| 15*   | Purified Indulin AT SA31 30% EtOAc/MeOH        | 2831           | 7429           | 3.5                  | 3.9                  | 11.2         | 0.0                               | 11                             | 3.6        | 2.6               | 5.4  | 0.4 | A+B          | A          |      |
| 16*   | Purified Indulin AT SA31 40% EtOAc/MeOH        | 4049           | 14771          | 3.6                  | 4.2                  | 12.0         | 0.0                               | 12                             | 4.3        | 2.8               | 3.4  | 0.0 | A+B          | A          |      |
| 17*   | Purified Indulin AT SA31 1:1 Acetone/MeOH      | 5207           | 30649          | 3.7                  | 4.5                  | 13.0         | 0.0                               | 13                             | 4.2        | 2.7               | 2.8  | 0.0 | A+B          | A          |      |
| 18    | Indulin AT SA31 Purified                       | 1264           | 6149           | 3.1                  | 3.8                  | 6.7          | 2.1                               | 1.2                            | 3.8        | 1.9               | 7.7  | 3.3 | A            | A          |      |
| 19*   | Crude Indulin AT SA31 EtOAc                    | 637            | 934            | 2.8                  | 3.0                  | 1.5          | 0.0                               | 1.5                            | 0.5        | 1.2               | 8.2  | 7.9 | B            | A          | 9    |
| 20*   | Crude Indulin AT SA31 5% EtOAc/MeOH            | 657            | 665            | 2.8                  | 2.8                  | 2.3          | 0.0                               | 2.3                            | 0.8        | 1.3               | 6.9  | 7.2 | B            | A          | 9    |

|     |                                                   |      |       |     |     |     |     |     |      |     |     |     |            |   |    |
|-----|---------------------------------------------------|------|-------|-----|-----|-----|-----|-----|------|-----|-----|-----|------------|---|----|
| 21* | Crude SA31 10% EtOAc/MeOH                         | 799  | 1226  | 2.9 | 3.1 | 3.5 | 0.0 | 3.5 | 1.2  | 1.5 | 6.7 | 4.9 | B          | A | 9  |
| 22* | Crude Indulin AT SA31 20% EtOAc/MeOH              | 1395 | 2135  | 3.1 | 3.3 | 6.9 | 0.0 | 6.9 | 2.0  | 1.8 | 5.2 | 2.0 | B          | A | 9  |
| 23* | Crude SA31 30% EtOAc/MeOH                         | 1939 | 3222  | 3.3 | 3.5 | 9.8 | 0.0 | 9.8 | 2.6  | 2.1 | 3.8 | 0.8 | B          | A | 9  |
| 24* | Crude Indulin AT SA31 100 %MeOH                   | 1960 | 4337  | 3.3 | 3.6 | 12  | 0.0 | 12  | 3.3  | 2.3 | 3.9 | 0.5 | B          | A | 9  |
| 25* | Purified BioChoice EtOAc                          | 981  | 1403  | 3.0 | 3.1 | 1.0 | 0.0 | 1.0 | 0.5  | 1.1 | 11  | 2.1 | A+B        | A |    |
| 26* | Purified BioChoice Kraft 5% EtOAc/MeOH            | 1455 | 2436  | 3.2 | 3.4 | 2.6 | 0.0 | 2.6 | 1.4  | 1.4 | 7.5 | 1.0 | A+B        | A |    |
| 27* | Purified BioChoice Kraft 10% EtOAc/MeOH           | 2173 | 3826  | 3.3 | 3.6 | 4.6 | 0.0 | 4.6 | 1.9  | 1.8 | 6.4 | 0.6 | A+B        | A |    |
| 28* | Purified BioChoice Kraft 20% EtOAc/MeOH           | 2914 | 5796  | 3.5 | 3.8 | 5.6 | 0.0 | 5.6 | 2.2  | 1.7 | 5.6 | 0.4 | A+B        | A |    |
| 29* | Purified BioChoice Kraft 30% EtOAc/MeOH           | 3658 | 10193 | 3.6 | 4.0 | 7.1 | 0.0 | 7.1 | 2.6  | 2.0 | 4.8 | 0.3 | A+B        | A |    |
| 30* | Purified BioChoice Kraft 40% EtOAc/MeOH           | 4066 | 12425 | 3.6 | 4.1 | 7.4 | 0.0 | 7.4 | 2.9  | 2.2 | 4.8 | 0.3 | A+B        | A |    |
| 31* | Purified BioChoice Kraft 1:1 Acetone/MeOH         | 4140 | 21959 | 3.6 | 4.3 | 9.3 | 0.0 | 9.3 | 3.2  | 2.5 | 4.0 | 0.3 | A+B        | A |    |
| 32  | BioChoice Kraft                                   | 1384 | 5481  | 3.1 | 3.7 | 5.4 | 0.0 | 7.3 | 1.9  | 1.5 | 6.1 | 2.1 | Commercial | A |    |
| 33  | Purified BioChoice Kraft                          | 1435 | 6216  | 3.2 | 3.8 | 4.1 | 0.0 | 1.2 | 4.1  | 1.3 | 1.4 | 8.2 | A          | A |    |
| 34  | P1000                                             | 1005 | 3733  | 3.0 | 3.6 | 5.2 | 0.0 | 5.2 | 1.0  | 1.1 | 0.0 | 0.0 | Commercial | B | 4  |
| 35  | P1000 f1                                          | 685  | 1312  | 2.8 | 3.1 | 1.2 | 0.0 | 1.2 | 0.3  | 1.1 | 0.0 | 0.0 | C          | B |    |
| 36  | P1000 f2                                          | 1360 | 2508  | 3.1 | 3.4 | 5.8 | 0.0 | 5.8 | 1.0  | 1.1 | 0.0 | 0.0 | C          | B |    |
| 37  | P1000 f3                                          | 1773 | 6747  | 3.2 | 3.8 | 12  | 0.0 | 12  | 1.6  | 1.1 | 0.0 | 0.0 | C          | B |    |
| 38  | P1000 f4                                          | 1957 | 10728 | 3.3 | 4.0 | 12  | 0.0 | 12  | 1.8  | 1.5 | 0.0 | 0.0 | C          | B |    |
| 39  | ECN High Temp Ethanol/Water Wheat Straw f1        | 788  | 1396  | 2.9 | 3.1 | 3.9 | 3.4 | 7.3 | 5.5  | 0.6 | 0.0 | 1.3 | D+C        | B |    |
| 40  | ECN High Temp Ethanol/Water Wheat Straw f2        | 992  | 2194  | 3.0 | 3.3 | 6.3 | 4.1 | 10  | 6.6  | 0.8 | 0.0 | 0.5 | D+C        | B |    |
| 41  | ECN High Temp Ethanol/Water Wheat Straw f3        | 1343 | 3253  | 3.1 | 3.5 | 11  | 4.5 | 15  | 5.6  | 0.7 | 0.0 | 0.0 | D+C        | B |    |
| 42  | RAIZ Eucalyptus Kraft 50% EtOAc/Et <sub>2</sub> O | 581  | 891   | 2.8 | 2.9 | 0.6 | 0.0 | 0.6 | 0.0  | 4.3 | 1.7 | 2.7 | B          | A |    |
| 43  | RAIZ Eucalyptus Kraft EtOAc                       | 920  | 1543  | 3.0 | 3.2 | 1.7 | 0.0 | 1.7 | 0.0  | 2.7 | 1.3 | 1.2 | B          | A |    |
| 44  | RAIZ Eucalyptus Kraft 10% EtOAc/MeOH              | 1185 | 2386  | 3.1 | 3.4 | 5.5 | 0.0 | 5.5 | 0.3  | 3.6 | 1.7 | 1.4 | B          | A |    |
| 45  | RAIZ Eucalyptus Kraft MeOH                        | 1486 | 5503  | 3.2 | 3.7 | 9.8 | 0.0 | 9.8 | 0.5  | 4.0 | 1.4 | 1.0 | B          | A |    |
| 46  | Dioxasolv Softwood                                | 1741 | 5257  | 3.2 | 3.7 | 26  | 0.0 | 26  | 5.5  | 3.9 | 0.0 | 0.0 | E          | B | 10 |
| 47  | Dioxasolv Softwood                                | 2301 | 4462  | 3.4 | 3.6 | 31  | 0.0 | 31  | 10.0 | 2.0 | 0.0 | 0.0 | E          | A | 11 |
| 48  | Dioxasolv Brewer's Spent Grains                   | 1937 | 5680  | 3.3 | 3.8 | 34  | 0.0 | 34  | 7.6  | 2.7 | 0.0 | 0.0 | E          | B | 10 |
| 49  | Alcell                                            | 985  | 3991  | 3.0 | 3.6 | 7.2 | 2.3 | 9.5 | 1.7  | 2.8 | 0.0 | 0.0 | Commercial | B | 4  |
| 50  | Sigma-Aldrich Organosolv                          | 1158 | 6999  | 3.1 | 3.8 | 9.6 | 0.0 | 9.6 | 0.8  | 0.4 | 0.0 | 0.0 | Commercial | B |    |
| 51  | ECN High Temp Ethanol/Water Spruce                | 985  | 2225  | 3.0 | 3.3 | 1.9 | 2.3 | 4.1 | 5.5  | 1.2 | 0.0 | 0.0 | D          | B | 4  |

|    |                                        |      |      |     |     |      |      |      |     |     |     |     |   |   |
|----|----------------------------------------|------|------|-----|-----|------|------|------|-----|-----|-----|-----|---|---|
| 52 | ECN Low Temp Ethanol/Water Wheat Straw | 1149 | 3350 | 3.1 | 3.5 | 9.2  | 12.0 | 21.3 | 5.4 | 1.2 | 0.0 | 0.0 | F | B |
| 53 | ECN Low Temp Ethanol/Water Pine        | 1239 | 4152 | 3.1 | 3.6 | 6.9  | 15.2 | 22.1 | 7.4 | 1.4 | 0.0 | 0.0 | F | B |
| 54 | ECN Low Temp Acetone/Water Wheat Straw | 1340 | 5232 | 3.1 | 3.7 | 13.7 | 0.0  | 13.7 | 4.5 | 1.4 | 0.0 | 0.0 | G | B |

7

<sup>[a]</sup> Batch Number Unknown (BNU) - a sample of Indulin AT kraft lignin for which we do not have a batch number, however, it is very similar to a lignin with batch number RF23 (data not shown).

**Table S2** <sup>31</sup>P NMR analysis of a selection of the calibration lignins in mmol/g (of dry lignin). Values >1 reported to 2 significant figures, <1 reported to 1 significant figure.

| Entry | Lignin                                 | Aliphatic OH | 5-substituted ArOH | Guaiacyl ArOH | <i>p</i> -Hydroxy ArOH | Total ArOH | Total COOH | Ref.         |
|-------|----------------------------------------|--------------|--------------------|---------------|------------------------|------------|------------|--------------|
| 1     | P1000 f1                               | 0.7          | 2.0                | 1.0           | 0.5                    | 3.5        | 0.9        |              |
| 2     | P1000 f2                               | 1.1          | 1.8                | 0.7           | 0.3                    | 2.7        | 0.7        |              |
| 3     | P1000 f3                               | 1.2          | 1.4                | 0.5           | 0.2                    | 2.1        | 0.6        |              |
| 4     | P1000 f4                               | 1.3          | 1.3                | 0.5           | 0.3                    | 2.1        | 0.6        |              |
| 5     | High Temp Ethanol/Water Wheat Straw f1 | 1.0          | 1.1                | 1.0           | 0.4                    | 2.6        | 0.2        |              |
| 6     | High Temp Ethanol/Water Wheat Straw f2 | 1.3          | 1.2                | 0.9           | 0.4                    | 2.5        | 0.1        |              |
| 7     | High Temp Ethanol/Water Wheat Straw f3 | 1.4          | 1.1                | 0.7           | 0.3                    | 2.1        | 0.2        |              |
| 8     | RAIZ Eucalyptus EtOAc                  | 0.5          | 2.3                | 0.6           | 0.0                    | 2.8        | 0.4        |              |
| 9     | RAIZ Eucalyptus 10% EtOAc/MeOH         | 0.6          | 1.3                | 0.3           | 0.0                    | 1.6        | 0.2        |              |
| 10    | RAIZ Eucalyptus MeOH                   | 0.7          | 0.7                | 0.3           | 0.0                    | 1.0        | 0.3        |              |
| 11    | Crude Indulin AT SA31 EtOAc            | 1.0          | 1.5                | 2.2           | 0.2                    | 3.8        | 0.7        | <sup>9</sup> |
| 12    | Crude Indulin AT SA31 5% EtOAc/MeOH    | 1.3          | 1.7                | 2.4           | 0.2                    | 4.4        | 0.6        | <sup>9</sup> |
| 13    | Crude SA31 10% EtOAc/MeOH              | 1.4          | 1.7                | 2.2           | 0.2                    | 4.1        | 0.5        | <sup>9</sup> |
| 14    | Crude Indulin AT SA31 20% EtOAc/MeOH   | 1.5          | 1.6                | 1.7           | 0.2                    | 3.5        | 0.4        | <sup>9</sup> |
| 15    | Crude SA31 30% EtOAc/MeOH              | 1.9          | 1.5                | 1.6           | 0.2                    | 3.3        | 0.4        | <sup>9</sup> |
| 16    | Crude Indulin AT SA31 100 %MeOH        | 2.0          | 1.4                | 1.3           | 0.2                    | 2.9        | 0.3        | <sup>9</sup> |
| 17    | Alcell                                 | 1.0          | 1.7                | 0.6           | 0.1                    | 2.4        | 0.2        | <sup>4</sup> |
| 18    | Sigma-Aldrich Organosolv               | 1.4          | 0.9                | 0.7           | 0.6                    | 2.3        | 1.4        |              |
| 19    | ECN Low Temp Ethanol/Water Wheat Straw | 2.3          | 0.9                | 0.6           | 0.3                    | 1.9        | 0.3        |              |
| 20    | ECN Low Temp Ethanol/Water Pine        | 2.6          | 0.7                | 1.0           | 0.1                    | 1.8        | 0.1        |              |
| 21    | ECN Low Temp Acetone/Water Wheat Straw | 1.8          | 0.8                | 0.6           | 0.3                    | 1.7        | 0.5        |              |

**Table S3** Optimisation of PLS modelling pre-processing parameters

| Entry | Property             | Spectral Range (cm <sup>-1</sup> ) | Pre-processing | Num. LVs | RMSEC | RMSECV | Bias     | CV Bias | R <sup>2</sup> Cal | R <sup>2</sup> CV |
|-------|----------------------|------------------------------------|----------------|----------|-------|--------|----------|---------|--------------------|-------------------|
| 1     | M <sub>n</sub>       | 4000-600                           |                | 5        | 466   | 564    | 6.8E-13  | 12      | 0.80               | 0.71              |
| 2     |                      | 4000-600                           | 1st derivative | 6        | 343   | 480    | 0        | 47      | 0.89               | 0.79              |
| 3     |                      | 4000-600                           | 2nd derivative | 6        | 263   | 507    | -6.8E-13 | 13      | 0.94               | 0.76              |
| 4     |                      | 2000-750                           |                | 5        | 471   | 571    | 0        | 19      | 0.79               | 0.70              |
| 5     |                      | 2000-750                           | 1st derivative | 7        | 261   | 401    | -4.5E-13 | 37      | 0.94               | 0.85              |
| 6     | Log(M <sub>n</sub> ) | 4000-600                           |                | 9        | 0.046 | 0.075  | 4.4E-16  | 0.00044 | 0.96               | 0.90              |
| 7     |                      | 4000-600                           | 1st derivative | 8        | 0.034 | 0.061  | 4.4E-16  | 0.0049  | 0.98               | 0.93              |
| 8     |                      | 4000-600                           | 2nd derivative | 6        | 0.035 | 0.069  | -8.9E-16 | 0.0051  | 0.98               | 0.91              |
| 9     |                      | 2000-750                           |                | 6        | 0.062 | 0.089  | 0        | 0.0086  | 0.93               | 0.85              |
| 10    |                      | 2000-750                           | 1st derivative | 7        | 0.034 | 0.059  | -1.8E-15 | 0.0081  | 0.98               | 0.94              |
| 11    | M <sub>w</sub>       | 4000-600                           |                | 5        | 3529  | 4176   | 1.8E-12  | 208     | 0.57               | 0.42              |
| 12    |                      | 4000-600                           | 1st derivative | 5        | 2851  | 4013   | -2.7E-12 | 126     | 0.72               | 0.49              |
| 13    |                      | 4000-600                           | 2nd derivative | 6        | 2096  | 4444   | 9.1E-13  | -72     | 0.85               | 0.38              |
| 14    |                      | 2000-750                           |                | 4        | 3670  | 4128   | 9.1E-13  | 202     | 0.54               | 0.43              |
| 15    |                      | 2000-750                           | 1st derivative | 10       | 1499  | 3015   | -9.1E-13 | 243     | 0.92               | 0.70              |
| 16    | Log(M <sub>w</sub> ) | 4000-600                           |                | 5        | 0.14  | 0.17   | -8.9E-16 | 0.0088  | 0.86               | 0.78              |
| 17    |                      | 4000-600                           | 1st derivative | 7        | 0.080 | 0.13   | -4.4E-16 | 0.0087  | 0.95               | 0.88              |
| 18    |                      | 4000-600                           | 2nd derivative | 6        | 0.077 | 0.17   | 1.3E-15  | 0.0012  | 0.96               | 0.79              |
| 19    |                      | 2000-750                           |                | 5        | 0.14  | 0.17   | -8.9E-16 | 0.0088  | 0.86               | 0.78              |
| 20    |                      | 2000-750                           | 1st derivative | 6        | 0.091 | 0.13   | -4.4E-16 | 0.0029  | 0.94               | 0.88              |
| 21    | β-O-4 <sup>a</sup>   | 4000-600                           |                | 4        | 2.2   | 2.8    | 0        | -0.19   | 0.90               | 0.84              |
| 22    |                      | 4000-600                           | 1st derivative | 4        | 1.8   | 2.9    | 0        | -0.030  | 0.94               | 0.84              |
| 23    |                      | 4000-600                           | 2nd derivative | 6        | 1.2   | 3.5    | 1.8E-15  | -0.048  | 0.97               | 0.76              |
| 24    |                      | 2000-750                           |                | 4        | 2.2   | 2.7    | 5.3E-15  | -0.12   | 0.91               | 0.86              |
| 25    |                      | 2000-750                           | 1st derivative | 4        | 1.8   | 2.8    | 1.8E-15  | -0.019  | 0.94               | 0.85              |
| 26    | β-5                  | 4000-600                           |                | 5        | 0.80  | 1.1    | 0        | 0.028   | 0.86               | 0.74              |
| 27    |                      | 4000-600                           | 1st derivative | 5        | 0.67  | 1.1    | 0        | 0.050   | 0.90               | 0.74              |



|    |                   |          |                |   |      |      |          |         |      |      |
|----|-------------------|----------|----------------|---|------|------|----------|---------|------|------|
| 28 |                   | 4000-600 | 2nd derivative | 5 | 0.61 | 1.2  | 0        | -0.022  | 0.92 | 0.68 |
| 29 |                   | 2000-750 |                | 5 | 0.73 | 1.1  | -4.4E-16 | 0.071   | 0.88 | 0.73 |
| 30 |                   | 2000-750 | 1st derivative | 4 | 0.74 | 1.1  | 0        | 0.035   | 0.88 | 0.75 |
| 31 |                   | 4000-600 |                | 4 | 0.46 | 0.55 | 0        | -0.018  | 0.70 | 0.58 |
| 32 |                   | 4000-600 | 1st derivative | 6 | 0.30 | 0.56 | 2.2E-16  | -0.059  | 0.87 | 0.59 |
| 33 | $\beta$ - $\beta$ | 4000-600 | 2nd derivative | 6 | 0.26 | 0.61 | 2.2E-16  | -0.0074 | 0.90 | 0.51 |
| 34 |                   | 2000-750 |                | 4 | 0.45 | 0.54 | 6.7E-16  | -0.019  | 0.72 | 0.59 |
| 35 |                   | 2000-750 | 1st derivative | 5 | 0.33 | 0.53 | 2.2E-16  | -0.048  | 0.85 | 0.61 |

<sup>a</sup> Total quantity of  $\beta$ -O-4 motifs defined as  $\beta$ -O-4 +  $\beta$ -O-4' (i.e.  $\alpha$ -OH +  $\alpha$ -OEt) -  $\alpha$ -OEt results from exchange of the (benzylic)  $\alpha$ -OH in the  $\beta$ -O-4 unit under acidic organosolv pulping conditions in the presence of EtOH.

**Table S4.** Results of partial least-squares (PLS) regression between hydroxyl group content as determined by <sup>31</sup>P NMR GPC and the ATR-FTIR spectra. A spectral range of 750-2000 cm<sup>-1</sup> was used together with 1<sup>st</sup> derivative pre-processing.

| Entry | Unit                                        | Num. LVs | Range | RMSEC | RMSECV | Bias     | CV Bias | R <sup>2</sup> Cal | R <sup>2</sup> CV |
|-------|---------------------------------------------|----------|-------|-------|--------|----------|---------|--------------------|-------------------|
| 1     | Aliphatic OH                                | 4        | 2.1   | 0.12  | 0.22   | 2.22E-16 | 0.0038  | 0.96               | 0.84              |
| 2     | 5-Substituted ArOH (G <sub>cond.</sub> + S) | 4        | 1.5   | 0.19  | 0.41   | 2.22E-16 | 0.059   | 0.79               | 0.17              |
| 3     | Guaiacyl OH                                 | 5        | 2.2   | 0.059 | 0.17   | 2.22E-16 | 0.024   | 0.99               | 0.93              |
| 4     | Total Phenols (inc. H)                      | 3        | 3.4   | 0.28  | 0.49   | 0        | 0.056   | 0.89               | 0.70              |
| 5     | Total COOH                                  | 6        | 1.3   | 0.048 | 0.13   | 0        | -0.0026 | 0.97               | 0.80              |

**Table S5.** GPC, 2D HSQC analysis and isolation methods of the set of lignins used for validation of the PLS model.

| Validation Lignin                          | Mn   | Mw    | Log <sub>10</sub> (M <sub>n</sub> ) | Log <sub>10</sub> (M <sub>w</sub> ) | β-O-4 | β-5 | β-β | SB5 | SB1 | Prep. Method |
|--------------------------------------------|------|-------|-------------------------------------|-------------------------------------|-------|-----|-----|-----|-----|--------------|
| Purified Indulin AT EtOAc (BNU)            | 730  | 1243  | 2.9                                 | 3.1                                 | 1.5   | 0.7 | 1.1 | 9.4 | 4.6 | A+B          |
| Purified Indulin AT 5% EtOAc/MeOH (BNU)    | 966  | 1817  | 3.0                                 | 3.3                                 | 3.3   | 1.2 | 1.5 | 9.7 | 2.0 | A+B          |
| Purified Indulin AT 10% EtOAc/MeOH (BNU)   | 1594 | 2940  | 3.2                                 | 3.5                                 | 5.5   | 2.2 | 1.9 | 7.9 | 1.1 | A+B          |
| Purified Indulin AT 20% EtOAc/MeOH (BNU)   | 1879 | 4185  | 3.3                                 | 3.6                                 | 8.5   | 3.0 | 2.1 | 4.5 | 0.9 | A+B          |
| Purified Indulin AT 30% EtOAc/MeOH (BNU)   | 2127 | 5683  | 3.3                                 | 3.8                                 | 9.6   | 3.5 | 2.3 | 5.1 | 0.4 | A+B          |
| Purified Indulin AT 40% EtOAc/MeOH (BNU)   | 2388 | 8527  | 3.4                                 | 3.9                                 | 12.8  | 4.2 | 2.8 | 4.1 | 0.5 | A+B          |
| Purified Indulin AT 1:1 Acetone/MeOH (BNU) | 2275 | 14403 | 3.4                                 | 4.2                                 | 12.1  | 3.6 | 2.4 | 3.2 | 0.3 | A+B          |

**Table S6.** Results measured by GPC and HSQC NMR and predicted by the PLS model for the validation set of kraft lignins. Predicted values are an average of two ATR-FTIR measurements. Meas. = measured, Pred. = predicted.

| Property             |       | EtOAc/MeOH |      |      |      |      |      | Acetone/MeOH        |
|----------------------|-------|------------|------|------|------|------|------|---------------------|
|                      |       | 0%         | 5%   | 10%  | 20%  | 30%  | 40%  | 50%                 |
| Log(M <sub>n</sub> ) | Meas. | 2.85       | 3.03 | 3.16 | 3.31 | 3.39 | 3.43 | 3.38 <sup>[a]</sup> |
|                      | Pred. | 2.84       | 3.05 | 3.20 | 3.34 | 3.44 | 3.52 | 3.57                |
| Log(M <sub>w</sub> ) | Meas. | 3.05       | 3.27 | 3.43 | 3.64 | 3.91 | 4.03 | 4.16 <sup>[a]</sup> |
|                      | Pred. | 2.98       | 3.21 | 3.40 | 3.63 | 3.85 | 4.04 | 4.37                |

<sup>[a]</sup> sample not fully soluble in THF after acetylation and values most likely underestimated with respect to the whole sample.

**Table S7.** Results of partial least-squares (PLS) regression between molecular weight and inter-unit abundances determined by GPC and 2D HSQC NMR for the 28 kraft lignin samples and their ATR-FTIR spectra using 1st derivative pre-processing, with and without baseline correction. Values reported to 2 significant figures.

| Entry | Unit                 | Range | Num. LVs | With Baseline Correction |        | Without Baseline Correction |        |
|-------|----------------------|-------|----------|--------------------------|--------|-----------------------------|--------|
|       |                      |       |          | RMSEC                    | RMSECV | RMSEC                       | RMSECV |
| 2     | Log(M <sub>n</sub> ) | 0.91  | 5        | 0.025                    | 0.046  | 0.025                       | 0.047  |
| 4     | Log(M <sub>w</sub> ) | 1.7   | 6        | 0.039                    | 0.097  | 0.040                       | 0.098  |
| 5     | β-O-4                | 12    | 6        | 0.25                     | 0.46   | 0.25                        | 0.46   |
| 6     | β-5                  | 3.8   | 6        | 0.095                    | 0.18   | 0.095                       | 0.17   |
| 7     | β-β                  | 1.8   | 3        | 0.13                     | 0.19   | 0.13                        | 0.19   |
| 8     | SB5                  | 8.0   | 3        | 0.79                     | 1.0    | 0.79                        | 1.0    |
| 9     | SB1                  | 7.9   | 5        | 0.26                     | 0.48   | 0.25                        | 0.48   |

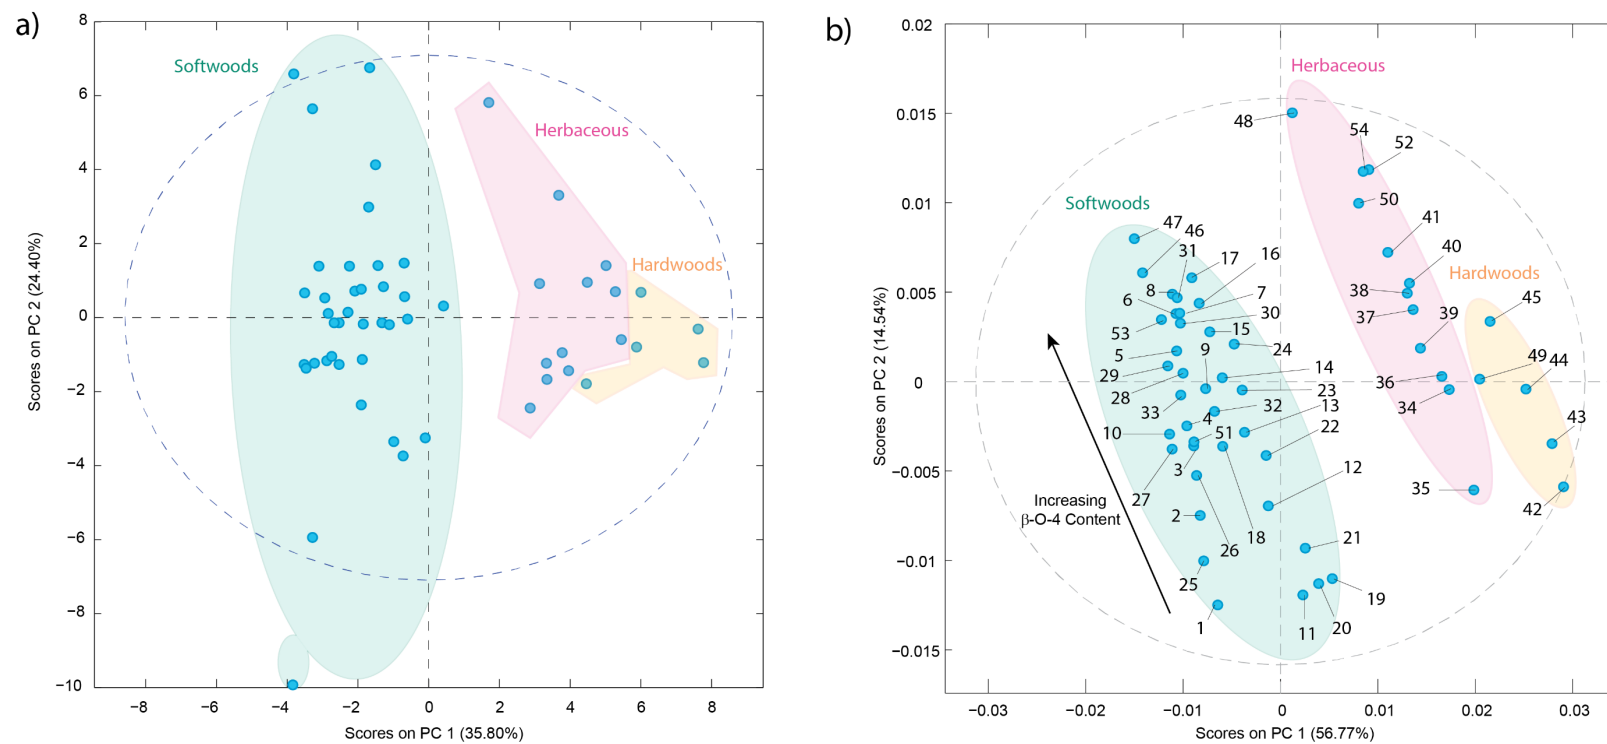

**Figure S1.** Comparison of PCA analysis a) without 1<sup>st</sup> derivative pre-processing and b) with 1<sup>st</sup> derivative pre-processing. The labels on b) correspond to the lignin entries in Table S1. The shaded areas are for illustrative purposes only.

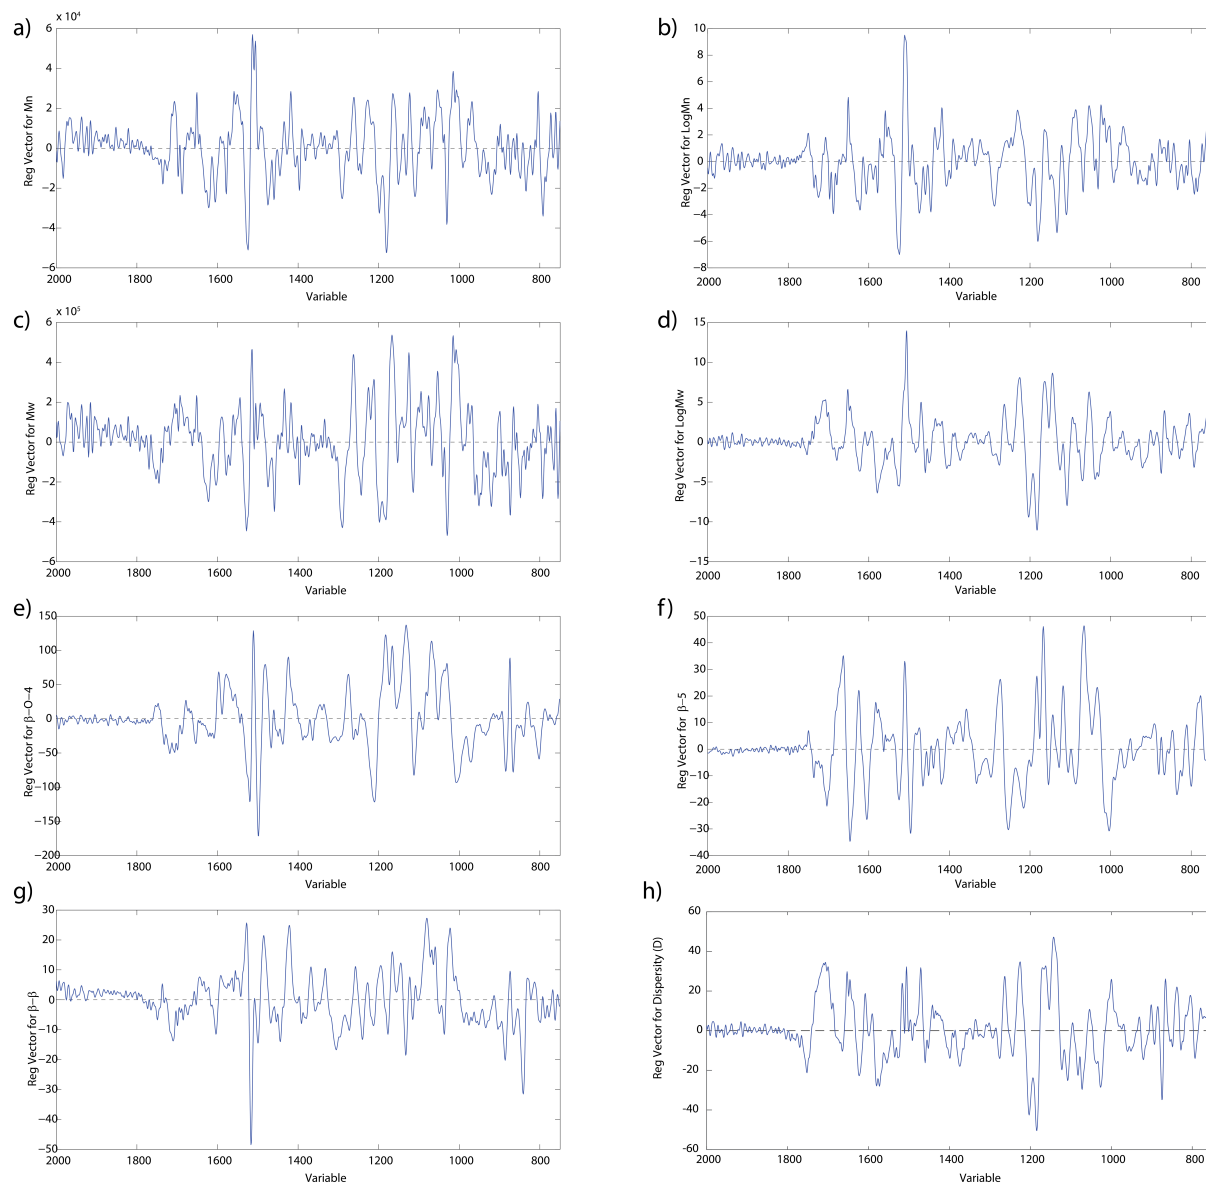

**Figure S2.** The regression vectors associated with PLS models reported in Table 1: a)  $M_n$ ; b)  $\text{Log}(M_n)$ ; c)  $M_w$ ; d)  $\text{Log}(M_w)$  e)  $\beta$ -O-4; f)  $\beta$ -5; g)  $\beta$ - $\beta$  content and h) dispersity.

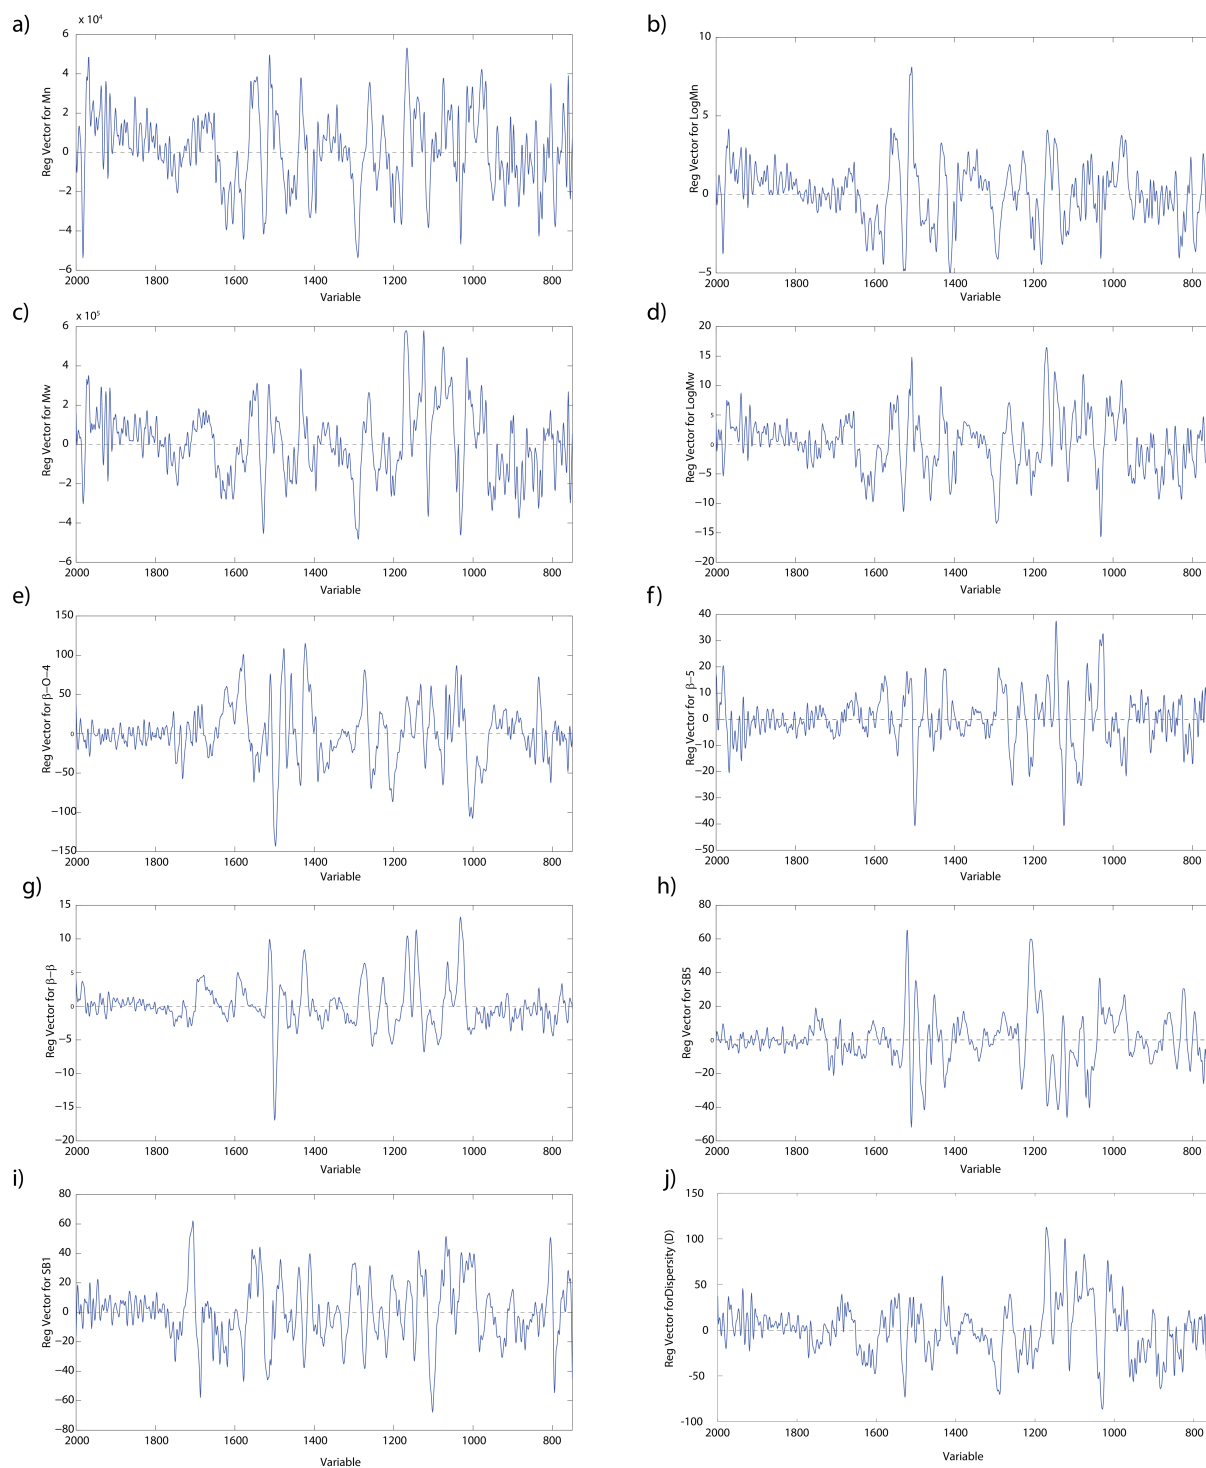

**Figure S3.** The regression vectors associated with PLS models reported in Table 2: a)  $M_n$ ; b)  $\text{Log}(M_n)$ ; c)  $M_w$ ; d)  $\text{Log}(M_w)$  e)  $\beta\text{-O-4}$ ; f)  $\beta\text{-5}$ ; g)  $\beta\text{-}\beta$ ; h) SB5; i) SB1 content and j) dispersity.

## References

- 1 R. Gosselink, J. van Der Putten, and D. van Es, (2015). Fractionation of technical lignin. WO/2015/178771.
- 2 J. Wildschut, A. T. Smit, J. H. Reith and W. J. J. Huijgen, Ethanol-based organosolv fractionation of wheat straw for the production of lignin and enzymatically digestible cellulose, *Bioresour. Technol.*, 2013, 135, 58–66.
- 3 P. de Wild, W. Huijgen and H. Heeres, Pyrolysis of wheat straw-derived organosolv lignin, *J. Anal. Appl. Pyrolysis*, 2012, 93, 95–103.
- 4 S. Constant, H. L. J. Wienk, A. E. Frissen, P. de Peinder, R. Boelens, D. S. van Es, R. J. H. Grisel, B. M. Weckhuysen, W. J. J. Huijgen, R. J. A. Gosselink and P. C. A. Bruijninx, New insights into the structure and composition of technical lignins: a comparative characterisation study, *Green Chem.*, 2016, 18, 2651–2665.
- 5 C. S. Lancefield, O. S. Ojo, F. Tran and N. J. Westwood, Isolation of Functionalized Phenolic Monomers through Selective Oxidation and C-O Bond Cleavage of the  $\beta$ -O-4 Linkages in Lignin, *Angew. Chemie Int. Ed.*, 2015, 54, 258–262.
- 6 D. M. Miles-Barrett, A. R. Neal, C. Hand, J. R. D. Montgomery, I. Panovic, O. S. Ojo, C. S. Lancefield, D. B. Cordes, A. M. Z. Slawin, T. Lebl and N. J. Westwood, The synthesis and analysis of lignin-bound Hibbert ketone structures in technical lignins, *Org. Biomol. Chem.*, 2016, 14, 10023–10030.
- 7 A. Smit and W. Huijgen, Effective fractionation of lignocellulose in herbaceous biomass and hardwood using a mild acetone organosolv process, *Green Chem.*, 2017, 19, 5505–5514.
- 8 H. Koskela, I. Kilpeläinen and S. Heikkinen, Some aspects of quantitative 2D NMR, *J. Magn. Reson.*, 2005, 174, 237–244.
- 9 C. S. Lancefield, H. L. J. Wienk, R. Boelens, B. M. Weckhuysen and P. C. A. Bruijninx, Identification of a diagnostic structural motif reveals a new reaction intermediate and condensation pathway in kraft lignin formation, *Chem. Sci.*, 2018, 9, 6348–6360.
- 10 R. Jastrzebski, S. Constant, C. S. Lancefield, N. J. Westwood, B. M. Weckhuysen and P. C. A. Bruijninx, Tandem catalytic depolymerization of lignin by water-tolerant Lewis acids and rhodium complexes, *ChemSusChem*, 2016, 9, 2074–2079.
- 11 C. S. Lancefield, L. W. Teunissen, B. M. Weckhuysen and P. C. A. Bruijninx, Iridium-catalysed primary alcohol oxidation and hydrogen shuttling for the depolymerisation of lignin, *Green Chem.*, 2018, 20, 3214–3221.
